# Supplementary material for: Facile hot-injection synthesis of stoichiometric Cu2ZnSnSe4 nanocrystals using bis(triethylsilyl) selenide
Source: Royal Society of Chemistry journal article supplement (doi:10.1039/c4dt00688g), 2014-01-01
Supplement: c4dt00688g1.pdf [file c4dt00688g1.pdf]

## Supporting Information

# Facile hot-injection synthesis of stoichiometric $\text{Cu}_2\text{ZnSnSe}_4$ nanocrystals using bis(triethylsilyl) selenide

Chunyu Jin, Parthiban Ramasamy and Jinkwon Kim\*

Department of Chemistry and GETRC, Kongju National University, 182, Shinkwondong, Kongju, 314-701, Chungnam-do, Republic of Korea. E-mail: jkim@kongju.ac.kr

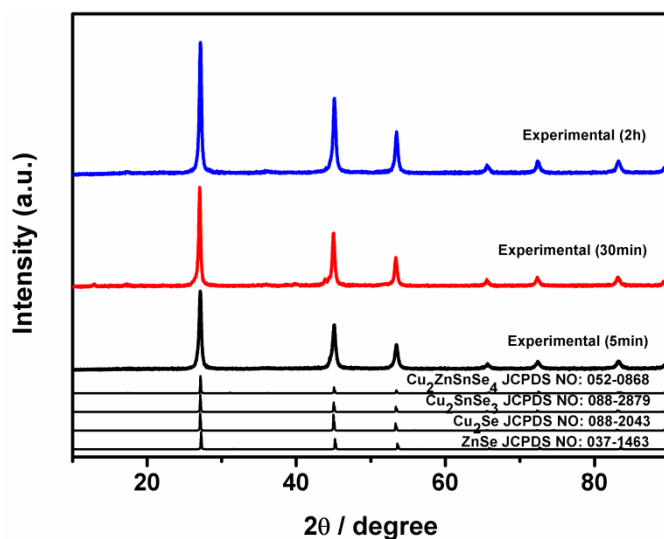

**Fig. S1** XRD pattern of the samples obtained at different reaction time where Se precursor added before  $\text{SnCl}_4$  addition.

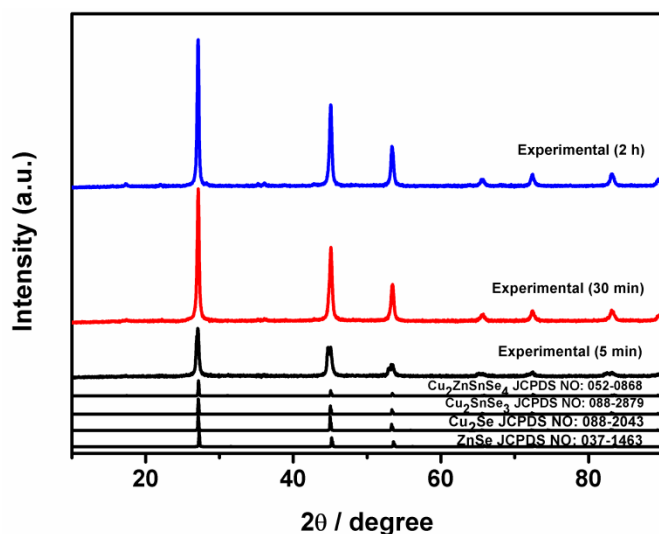

**Fig. S2** XRD pattern of the samples obtained at different reaction time where Se precursor added after SnCl<sub>4</sub> addition.
